# Supplementary material for: Quinolizine-2,4-diones by reversible dimerisation 2-pyridylketenesElectronic supplementary information (ESI) available: figure of experimental (Ar matrix, 10 K) IR spectrum of 10b and calculated (B3LYP/6-31G*) IR spectra of s-cis- and s-trans-10b, and tables of Cartesian coordinates and calculated IR spectra of s-cis- and s-trans-10a,b, 2-(2-pyridyl)benzocyclobutenone, and hypothetical ylides 3 (Me and Ph in place of H). See http://www.rsc.org/suppdata/p1/b2/b202523j/
Source: Royal Society of Chemistry journal article supplement (doi:10.1039/b202523j), 2002-04-30
Supplement: b202523j.doc [file b202523j.doc]

Supplementary data

Figure S1 of the experimental IR spectrum of phenyl(2-pyridyl)ketene (Ar matrix, 10 K and the.canculated IR spectra of phenyl(2-pyridyl)ketenes s-*Z-* and s-*E*-**10b** (B3LYP/6-31G*). Tables of standard orientation of optimized structures and IR spectra of methyl- and phenyl(2-pyridyl)ketenes s-*Z-* and s-*E*-**10a,b**, hypothetical ylides **3** (Me and Ph in place of H), and 2-(2-pyridyl)benzocyclobutenone.

All calculations were performed at the (B3LYP/6-31G*) level using the Gaussian 94 suite of programs.

700

800

1000

2200

2000

1600

1400

1200

1800

(c)

(b)

(a)

**Figure S1** IR spectra of phen(2-pyridyl)ketene **10a**. (a) Experimental spectrum (Ar matrix, 10 K; ketene signal at 2117 cm-1). (b) and (c) B3LYP/6-31G* calculated spectra of the s-*Z* and s-*E* conformers, respectively (scaling factor 0.9613; ketene peaks at 2117 and 2104 cm-1, respectively). The absorbances of the ketene peaks in the 2100 cm-1 region are attenuated by a factor of 2 in each case.

**s-Z-Phenyl(2-pyridyl)ketene;** B3LYP/6-31G(d), files ar47_b3lyp.*

Symmetry: C1

Standard orientation:

----------------------------------------------------------

Center Atomic Coordinates (Angstroms)

Number Number X Y Z

----------------------------------------------------------

1 7 2.428285 0.802431 0.203625

2 6 1.332657 0.045097 -0.023038

3 6 1.422712 -1.318859 -0.346253

4 6 2.683400 -1.905059 -0.417559

5 6 3.816709 -1.128312 -0.178044

6 6 3.626062 0.222273 0.120567

7 6 0.049316 0.762151 0.061578

8 1 0.527463 -1.897086 -0.545693

9 1 2.777159 -2.959298 -0.665351

10 1 4.815995 -1.549352 -0.223744

11 1 4.479842 0.872442 0.306445

12 6 0.117004 2.090589 0.198212

13 8 0.110477 3.250472 0.316012

14 6 -1.306713 0.142614 0.028603

15 6 -2.308665 0.646050 -0.816374

16 6 -3.586088 0.085514 -0.820716

17 6 -3.878578 -1.001832 0.003229

18 6 -2.887339 -1.516483 0.842453

19 6 -1.616754 -0.943916 0.865166

20 1 -2.078481 1.475714 -1.479656

21 1 -4.348611 0.492310 -1.479505

22 1 -4.870319 -1.445459 -0.007350

23 1 -3.107775 -2.358181 1.493742

24 1 -0.859418 -1.330849 1.540709

----------------------------------------------------------

HF=-630.7504872

Zero-point correction=0.184532 (Hartree/Particle)

Sum of electronic and zero-point Energies=-630.565955

Dipole moment (Debye):

X= -0.5545 Y= -2.8412 Z= -0.5075 Tot= 2.9389

IR spectrum:

Moden-Nr. Frequencies abs.Int. rel. Int. Scale :0.9613

1 35.1305 .09061 0 33

2 54.5553 .06066 0 52

3 81.0756 .00964 0 77

4 95.913 .09461 0 92

5 121.6054 .01494 0 116

6 205.6847 .06588 0 197

7 239.3304 .32404 0 230

8 293.3252 .1997 0 281

9 378.472 .10087 0 363

10 415.483 .22499 0 399

11 419.6992 .07681 0 403

12 435.6756 .50441 0 418

13 501.635 1.64671 1 482

14 507.6885 .73632 0 488

15 532.3543 .40938 0 511

16 589.7556 .08683 0 566

17 634.7212 .36932 0 610

18 635.9983 .03284 0 611

19 680.6852 .26112 0 654

20 714.1042 2.6163 2 686

21 733.5474 .43458 0 705

22 759.988 1.04097 1 730

23 775.1105 1.44455 1 745

24 793.9982 4.55882 5 763

25 859.4627 .00707 0 826

26 897.3501 .14848 0 862

27 927.645 .13599 0 891

28 962.3067 .06676 0 925

29 969.955 .01825 0 932

30 976.62 .02011 0 938

31 995.8835 .03248 0 957

32 1001.137 .02274 0 962

33 1007.956 .28639 0 968

34 1017.173 .06016 0 977

35 1058.7 .39293 0 1017

36 1076.534 .37657 0 1034

37 1110.236 .46711 0 1067

38 1125.447 .31142 0 1081

39 1155.025 .70031 0 1110

40 1186.988 .54163 0 1141

41 1193.81 .00904 0 1147

42 1215.828 .02136 0 1168

43 1297.319 .35882 0 1247

44 1312.765 2.45072 2 1261

45 1325.349 .72982 0 1274

46 1359.435 2.30846 2 1306

47 1365.713 .30598 0 1312

48 1381.589 1.47443 1 1328

49 1479.531 6.56246 7 1422

50 1496.549 2.11962 2 1438

51 1513.679 10.94466 12 1455

52 1543.889 3.40565 3 1484

53 1623.076 2.00171 2 1560

54 1634.126 .34245 0 1570

55 1645.482 17.15575 19 1581

56 1658.012 1.28763 1 1593

57 2202.614 90.01695 100 2117

58 3169.612 3.07904 3 3046

59 3182.058 .32131 0 3058

60 3188.15 .11534 0 3064

61 3191.166 1.21504 1 3067

62 3197.684 1.89121 2 3073

63 3204.727 3.07377 3 3080

64 3212.294 1.31211 1 3087

65 3216.458 2.30607 2 3091

66 3225.199 .45494 0 3100

ar47 Z-Ph-Pyr-ket B3LYP/6-31G* 0.9613

**s-E-Phenyl(2-pyridyl)ketene;** B3LYP/6-31G(d), files ar48_b3lyp.*

Symmetry: C1

Standard orientation:

----------------------------------------------------------

Center Atomic Coordinates (Angstroms)

Number Number X Y Z

----------------------------------------------------------

1 7 1.316293 -1.208429 -0.260405

2 6 1.353566 0.109060 -0.009701

3 6 2.571510 0.800298 0.155038

4 6 3.764299 0.101440 0.037748

5 6 3.726807 -1.270233 -0.228218

6 6 2.476386 -1.867800 -0.361443

7 6 0.046993 0.804780 0.077454

8 1 2.578810 1.865526 0.371930

9 1 4.712600 0.618620 0.157436

10 1 4.635413 -1.856018 -0.324885

11 1 2.393551 -2.934955 -0.562734

12 6 0.021995 2.129230 0.209612

13 8 -0.006366 3.292790 0.330312

14 6 -1.286196 0.130501 0.027092

15 6 -2.325832 0.676746 -0.741299

16 6 -3.590762 0.088072 -0.752135

17 6 -3.830066 -1.068036 -0.010199

18 6 -2.796841 -1.625788 0.747716

19 6 -1.537911 -1.030583 0.776287

20 1 -2.137904 1.561090 -1.345253

21 1 -4.382692 0.527960 -1.352439

22 1 -4.811212 -1.534852 -0.024717

23 1 -2.973716 -2.528119 1.327238

24 1 -0.741653 -1.468685 1.366051

----------------------------------------------------------

HF=-630.7463391

Zero-point correction=0.184246 (Hartree/Particle)

Sum of electronic and zero-point Energies=-630.562093

Dipole moment (Debye):

X= 1.3420 Y= -0.3966 Z= 0.1780 Tot= 1.4106

IR spectrum:

Moden-Nr. Frequencies abs.Int. rel. Int. Scale :0.9613

1 21.2988 .14917 0 20

2 37.427 .05159 0 35

3 81.8761 .07822 0 78

4 95.3639 .05573 0 91

5 121.6718 .18214 0 116

6 200.6308 .08444 0 192

7 243.5209 .03058 0 234

8 295.815 .06551 0 284

9 369.1949 .0223 0 354

10 412.3168 .22697 0 396

11 417.3439 .07259 0 401

12 439.2493 .34276 0 422

13 498.7117 1.58081 1 479

14 521.4107 .22609 0 501

15 530.5835 .39909 0 510

16 577.2285 .15309 0 554

17 635.2307 .10509 0 610

18 636.3416 .08175 0 611

19 685.5899 .55522 0 659

20 708.7711 2.69868 3 681

21 733.2256 .70555 0 704

22 753.6583 .88681 1 724

23 771.5101 1.44406 1 741

24 792.0495 4.91105 5 761

25 851.6492 .00961 0 818

26 888.663 .08175 0 854

27 920.0078 .1512 0 884

28 949.5624 .07581 0 912

29 963.634 .01664 0 926

30 974.9621 .01996 0 937

31 991.625 .0267 0 953

32 997.6331 .00233 0 959

33 1003.14 .71562 0 964

34 1018.004 .04291 0 978

35 1059.331 .29519 0 1018

36 1077.441 .28616 0 1035

37 1112.864 .446 0 1069

38 1124.499 .21635 0 1080

39 1169.972 1.12173 1 1124

40 1192.806 1.19367 1 1146

41 1193.646 .04666 0 1147

42 1218.058 .03845 0 1170

43 1301.496 .16122 0 1251

44 1317.455 2.26625 2 1266

45 1327.395 5.17394 6 1276

46 1336.695 3.23792 3 1284

47 1365.533 .15548 0 1312

48 1383.789 .6586 0 1330

49 1472.104 6.25332 7 1415

50 1493.54 1.73593 2 1435

51 1521.295 8.14678 9 1462

52 1543.403 2.51751 2 1483

53 1618.706 2.94463 3 1556

54 1635.535 .46149 0 1572

55 1646.931 13.19842 15 1583

56 1657.913 .85435 0 1593

57 2189.286 85.79328 100 2104

58 3168.809 2.92843 3 3046

59 3179.081 .39118 0 3056

60 3182.887 .48291 0 3059

61 3186.308 .2224 0 3062

62 3196.305 .285047 0 3072

63 3199.729 1.72335 2 3075

64 3208.409 3.11162 3 3084

65 3217.944 1.89603 2 3093

66 3236.423 .52816 0 3111

ar48 E-Ph-Pyr-ket B3LYP/6-31G* 0.9613

Gaussian 94

**2-(2-pyridyl)-benzocyclobutenone;** B3LYP/6-31G(d), files ar64_b3lyp.*

Symmetry: C1

Standard orientation:

----------------------------------------------------------

Center Atomic Coordinates (Angstroms)

Number Number X Y Z

----------------------------------------------------------

1 6 0.700891 1.666955 0.184292

2 6 1.856989 0.766221 -0.098911

3 6 1.209768 -0.320331 0.504202

4 6 -0.033828 0.465904 0.912164

5 8 0.390367 2.809892 -0.043638

6 6 3.122319 0.668158 -0.676083

7 6 3.713621 -0.597039 -0.624654

8 6 3.058372 -1.692267 -0.029865

9 6 1.786087 -1.581133 0.548359

10 1 3.622108 1.511230 -1.143500

11 1 4.699232 -0.747385 -1.056979

12 1 3.559850 -2.656901 -0.024816

13 1 1.285891 -2.437229 0.988229

14 6 -1.380155 0.037844 0.373797

15 7 -1.564009 -1.277061 0.185917

16 6 -2.755804 -1.680829 -0.272354

17 6 -3.807928 -0.813520 -0.563600

18 6 -3.605883 0.553438 -0.369928

19 6 -2.373151 0.990613 0.107686

20 1 -2.871048 -2.754484 -0.413947

21 1 -4.752803 -1.199659 -0.934046

22 1 -4.394379 1.268003 -0.591096

23 1 -2.163805 2.044949 0.258491

24 1 -0.107713 0.647687 1.994711

----------------------------------------------------------

HF=-630.7390114

Zero-point correction=0.185512 (Hartree/Particle)

Sum of electronic and zero-point Energies=-630.553499

Dipole moment (Debye):

X= -0.0779 Y= -1.9596 Z= 0.0030 Tot= 1.9612

IR spectrum:

Moden-Nr. Frequencies abs.Int. rel. Int. Scale :0.9613

1 30.8246 2.5117 0 29

2 60.7326 1.0591 0 58

3 90.9127 4.1681 1 87

4 118.0691 1.832 0 113

5 184.5508 .4576 0 177

6 236.9687 .7986 0 227

7 289.3642 1.3192 0 278

8 306.5871 .8339 0 294

9 403.3415 .6225 0 387

10 416.5656 2.9196 0 400

11 457.1136 .9576 0 439

12 477.8507 4.9311 1 459

13 529.0831 3.6117 0 508

14 546.2411 14.8454 4 525

15 626.7668 6.445 1 602

16 643.1205 .6306 0 618

17 656.4416 10.8493 2 631

18 712.1418 12.268 3 684

19 751.7381 4.3244 1 722

20 758.5984 4.8045 1 729

21 770.6064 8.6462 2 740

22 782.3262 45.9279 12 752

23 807.3623 1.9805 0 776

24 872.5709 13.6514 3 838

25 886.7959 6.8547 1 852

26 908.7534 .6719 0 873

27 930.2985 4.5834 1 894

28 957.255 .9088 0 920

29 977.5444 37.6502 10 939

30 979.0795 15.8754 4 941

31 998.4153 .2176 0 959

32 1009.904 .8446 0 970

33 1013.178 4.3955 1 973

34 1029.915 .8072 0 990

35 1078.178 3.1936 0 1036

36 1110.151 30.5612 8 1067

37 1123.488 3.029 0 1080

38 1154.546 17.9497 4 1109

39 1171.961 27.1312 7 1126

40 1177.556 2.7812 0 1131

41 1187.857 1.8101 0 1141

42 1210.347 4.6709 1 1163

43 1246.799 20.2459 5 1198

44 1299.668 4.0211 1 1249

45 1309.401 10.4982 2 1258

46 1325.491 .9468 0 1274

47 1333.976 1.8793 0 1282

48 1395.793 12.6658 3 1341

49 1475.408 29.0254 7 1418

50 1489.784 2.5455 0 1432

51 1511.277 31.8159 8 1452

52 1522.885 34.586 9 1463

53 1626.795 14.4452 3 1563

54 1644.476 97.1015 26 1580

55 1647.522 27.5454 7 1583

56 1654.712 5.0776 1 1590

57 1862.687 370.8003 100 1790

58 3028.06 13.463 3 2910

59 3168.736 24.109 6 3046

60 3184.903 2.7787 0 3061

61 3192.609 11.6604 3 3069

62 3199.465 18.1401 4 3075

63 3211.741 23.1928 6 3087

64 3215.221 19.3815 5 3090

65 3220.358 5.4722 1 3095

66 3227.542 7.0489 1 3102

ar64 ph insertion B3LYP/6-31G* 0.9613

Gaussian 94

**s-Z-Methyl(2-pyridyl)ketene;** B3LYP/6-31G(d), files ar65_b3lyp.*

Symmetry: C1 (structure is CS but Calculation input was C1

Standard orientation:

----------------------------------------------------------

Center Atomic Coordinates (Angstroms)

Number Number X Y Z

----------------------------------------------------------

1 7 -0.486832 -1.118774 0.000000

2 6 -0.108612 0.179394 -0.000005

3 6 -1.044354 1.227986 -0.000001

4 6 -2.401152 0.913903 -0.000001

5 6 -2.794119 -0.423557 0.000000

6 6 -1.790271 -1.395564 0.000004

7 6 1.335497 0.427057 0.000005

8 1 -0.717539 2.262515 0.000002

9 1 -3.142459 1.708944 0.000000

10 1 -3.841042 -0.709668 -0.000002

11 1 -2.048569 -2.453743 0.000002

12 6 2.140011 -0.634036 -0.000001

13 8 2.897397 -1.522827 -0.000001

14 6 1.942710 1.815961 0.000001

15 1 3.035517 1.775506 -0.000033

16 1 1.632216 2.381816 -0.887452

17 1 1.632270 2.381796 0.887485

----------------------------------------------------------

HF=-439.0131672

Zero-point correction=0.131611 (Hartree/Particle)

Sum of electronic and zero-point Energies=-438.881556

Dipole moment (Debye):

X= -1.3589 Y= 2.6547 Z= 0.0000 Tot= 2.9823

IR spectrum:

Moden-Nr. Frequencies abs.Int. rel. Int. Scale :0.9613

1 69.9652 .156 0 67

2 121.7355 .2886 0 117

3 131.3046 2.2213 0 126

4 193.142 .0332 0 185

5 226.066 1.8897 0 217

6 299.7706 .0015 0 288

7 404.2943 8.4098 0 388

8 417.7782 2.803 0 401

9 447.8349 .3157 0 430

10 502.6565 12.4644 1 483

11 558.4719 .8529 0 536

12 634.4632 2.9915 0 609

13 670.8364 .2173 0 644

14 746.7737 5.8816 0 717

15 758.2074 8.1485 0 728

16 791.1201 40.6922 4 760

17 886.3625 1.9689 0 852

18 976.036 .236 0 938

19 977.1337 1.6578 0 939

20 997.5832 .0029 0 958

21 1007.063 2.6112 0 968

22 1066.791 .086 0 1025

23 1070.526 8.981 0 1029

24 1109.358 2.3824 0 1066

25 1130.08 8.8172 0 1086

26 1188.86 7.013 0 1142

27 1288.71 30.4077 3 1238

28 1310.199 12.7309 1 1259

29 1354.657 3.0019 0 1302

30 1405.96 6.1617 0 1351

31 1442.115 3.2114 0 1386

32 1485.647 42.0963 4 1428

33 1510.388 7.2849 0 1451

34 1517.707 116.2536 12 1458

35 1538.946 23.9752 2 1479

36 1624.928 23.1666 2 1562

37 1647.337 166.329 17 1583

38 2211.719 944.478 100 2126

39 3036.02 31.2197 3 2918

40 3088.415 22.4492 2 2968

41 3133.078 13.215 1 3011

42 3167.71 27.2418 2 3045

43 3190.129 11.3653 1 3066

44 3213.548 22.8778 2 3089

45 3219.287 9.153 0 3094

ar65 Z-pyr-Me-ket B3LYP/6-31G* 0.9613

Gaussian 94

**s-E-Methyl(2-pyridyl)ketene;** B3LYP/6-31G(d), files ar66_b3lyp.*

Symmetry: C1 (structure is CS but Calculation input was C1

Standard orientation:

----------------------------------------------------------

Center Atomic Coordinates (Angstroms)

Number Number X Y Z

----------------------------------------------------------

1 7 0.914665 1.187744 0.000151

2 6 0.110421 0.110820 0.000082

3 6 0.622236 -1.203039 -0.000077

4 6 1.996588 -1.389088 -0.000073

5 6 2.835850 -0.270303 -0.000013

6 6 2.238323 0.986991 0.000044

7 6 -1.334422 0.404583 -0.000008

8 1 -0.050328 -2.057248 -0.000283

9 1 2.410914 -2.393856 -0.000142

10 1 3.916630 -0.370676 0.000017

11 1 2.850445 1.887929 -0.000009

12 6 -2.227145 -0.574489 0.000151

13 8 -3.026182 -1.432180 0.000031

14 6 -1.825800 1.842221 -0.000158

15 1 -2.918614 1.893726 -0.002262

16 1 -1.451047 2.368200 0.883635

17 1 -1.447499 2.368985 -0.881958

----------------------------------------------------------

HF=-439.0119458

Zero-point correction=0.131480 (Hartree/Particle)

Sum of electronic and zero-point Energies=-438.880466

Dipole moment (Debye):

X= 1.1250 Y= -0.4089 Z= -0.0003 Tot= 1.1970

IR spectrum:

Moden-Nr. Frequencies abs.Int. rel. Int. Scale :0.9613

1 51.2314 1.5617 0 49

2 119.7843 2.8996 0 115

3 135.2243 2.4538 0 129

4 160.0894 .0038 0 153

5 230.259 1.6578 0 221

6 299.8153 .0022 0 288

7 403.9231 3.6209 0 388

8 415.1718 2.7752 0 399

9 462.4197 .7995 0 444

10 496.3917 11.9113 1 477

11 546.3023 .0284 0 525

12 634.9888 2.3707 0 610

13 684.5725 1.3522 0 658

14 745.5238 7.3823 0 716

15 755.8269 5.9242 0 726

16 791.1611 41.3397 4 760

17 889.5636 1.0844 0 855

18 974.8207 .1594 0 937

19 980.7787 .5596 0 942

20 997.7549 .008 0 959

21 1003.269 10.1615 1 964

22 1064.583 .3308 0 1023

23 1072.369 2.5597 0 1030

24 1103.825 16.0366 1 1061

25 1127.168 .5273 0 1083

26 1191.027 12.3622 1 1144

27 1290.81 21.4899 2 1240

28 1319.928 4.5558 0 1268

29 1332.473 49.1783 5 1280

30 1407.904 3.7946 0 1353

31 1440.062 1.8656 0 1384

32 1474.361 66.8182 7 1417

33 1502.803 5.9373 0 1444

34 1515.511 39.4968 4 1456

35 1534.018 62.3082 6 1474

36 1617.71 35.6367 3 1555

37 1649.43 113.9227 12 1585

38 2200.84 921.3351 100 2115

39 3059.444 24.6064 2 2941

40 3126.836 12.5188 1 3005

41 3137.875 16.796 1 3016

42 3167.005 31.726 3 3044

43 3181.955 4.8117 0 3058

44 3198.98 17.423 1 3075

45 3217.065 17.2252 1 3092

ar66 E-pyr-Me-ket B3LYP/6-31G* 0.9613

Gaussian 94

**Ylide 3 (Me in place of H);** B3LYP/6-31G(d), files ar70_b3lyp.*

Symmetry: CS

State=1-A'

Standard orientation:

----------------------------------------------------------

Center Atomic Coordinates (Angstroms)

Number Number X Y Z

----------------------------------------------------------

1 7 0.000000 0.545393 0.000000

2 6 0.943762 1.484054 0.000000

3 6 2.298368 1.048422 0.000000

4 6 2.608420 -0.289754 0.000000

5 6 1.552442 -1.272128 0.000000

6 6 0.278474 -0.822109 0.000000

7 6 -1.304250 -1.032445 0.000000

8 6 -1.409230 0.393602 0.000000

9 8 -2.009425 -2.020021 0.000000

10 1 0.640579 2.523622 0.000000

11 1 3.078046 1.802904 0.000000

12 1 3.643398 -0.615430 0.000000

13 1 1.768910 -2.334762 0.000000

14 6 -2.442039 1.453832 0.000000

15 1 -3.426504 0.975554 0.000000

16 1 -2.392356 2.104845 0.886997

17 1 -2.392356 2.104845 -0.886997

----------------------------------------------------------

HF=-438.951467

Zero-point correction=0.130986 (Hartree/Particle)

Sum of electronic and zero-point Energies=-438.820481

Dipole moment (Debye):

X= 3.6196 Y= 3.6112 Z= 0.0000 Tot= 5.1130

IR spectrum:

Moden-Nr. Frequencies abs.Int. rel. Int. Scale :0.9613

1 110.6142 1.9922 0 106

2 152.6685 .0268 0 146

3 157.7002 .8076 0 151

4 193.7836 .4354 0 186

5 239.1108 1.0679 0 229

6 276.6266 1.4845 0 265

7 390.9975 .2936 0 375

8 493.3501 4.2648 0 474

9 513.6659 3.1185 0 493

10 581.0093 17.4178 3 558

11 646.5979 16.5994 3 621

12 647.8597 7.4844 1 622

13 738.1564 46.6385 8 709

14 745.8781 1.435 0 717

15 767.2024 11.4893 2 737

16 794.968 11.265 2 764

17 824.5218 1.327 0 792

18 906.4666 4.2001 0 871

19 910.7084 51.1297 9 875

20 955.1251 .3807 0 918

21 971.6809 58.0591 11 934

22 1045.661 11.9109 2 1005

23 1067.071 .0035 0 1025

24 1068.626 13.31 2 1027

25 1091.918 11.4141 2 1049

26 1179.905 57.4554 10 1134

27 1191.974 11.1506 2 1145

28 1299.777 80.0768 15 1249

29 1403.525 48.183 9 1349

30 1435.51 34.2526 6 1379

31 1443.14 .9707 0 1387

32 1460.76 33.4834 6 1404

33 1498.55 7.9519 1 1440

34 1522.361 81.022 15 1463

35 1534.534 27.4813 5 1475

36 1601 213.3343 40 1539

37 1693.99 4.8625 0 1628

38 1867.059 523.3531 100 1794

39 2994.934 84.0482 16 2879

40 3027.671 37.6779 7 2910

41 3127.269 4.0099 0 3006

42 3210.303 1.0969 0 3086

43 3224.66 12.224 2 3099

44 3233.491 5.4929 1 3108

45 3248.277 3.7095 0 3122

ar70 pyr ylide methyl B3LYP/6-31G* .9613

Gaussian 94

**Ylide 3 (Ph in place of H);** B3LYP/6-31G(d), files ar73_b3lyp.*

Symmetry: CS

State=1-A'

Standard orientation:

----------------------------------------------------------

Center Atomic Coordinates (Angstroms)

Number Number X Y Z

----------------------------------------------------------

1 7 -1.212550 -0.339569 0.000000

2 6 -1.679549 -1.588357 0.000000

3 6 -3.090128 -1.762293 0.000000

4 6 -3.938193 -0.680679 0.000000

5 6 -3.395870 0.652084 0.000000

6 6 -2.049095 0.776341 0.000000

7 6 -0.740846 1.652135 0.000000

8 6 0.000000 0.416662 0.000000

9 8 -0.536373 2.847925 0.000000

10 1 -0.978999 -2.410929 0.000000

11 1 -3.477124 -2.775746 0.000000

12 1 -5.013668 -0.823482 0.000000

13 1 -4.035975 1.527166 0.000000

14 6 1.376493 0.020861 0.000000

15 6 1.813799 -1.321099 0.000000

16 6 3.173470 -1.626658 0.000000

17 6 4.131719 -0.612951 0.000000

18 6 3.710710 0.722037 0.000000

19 6 2.359609 1.041183 0.000000

20 1 1.095320 -2.134615 0.000000

21 1 3.483465 -2.668838 0.000000

22 1 5.190248 -0.856756 0.000000

23 1 4.445562 1.523213 0.000000

24 1 2.037296 2.077978 0.000000

----------------------------------------------------------

HF=-630.6982441

Zero-point correction=0.184491 (Hartree/Particle)

Sum of electronic and zero-point Energies=-630.513753

Dipole moment (Debye):

X= -3.2587 Y= -4.3035 Z= 0.0000 Tot= 5.3981

IR spectrum:

Moden-Nr. Frequencies abs.Int. rel. Int. Scale :0.9613

1 36.9684 1.0591 0 35

2 61.8042 .1777 0 59

3 105.3106 1.752 0 101

4 153.0942 .5765 0 147

5 191.0265 .1553 0 183

6 225.9858 .2545 0 217

7 306.7029 4.487 0 294

8 313.9537 .1374 0 301

9 327.3801 .0901 0 314

10 392.5305 .1302 0 377

11 412.567 .011 0 396

12 508.7716 1.9037 0 489

13 521.9674 5.1095 1 501

14 545.7336 6.0957 1 524

15 632.315 10.5905 2 607

16 632.6746 20.0821 4 608

17 647.1112 13.8613 2 622

18 681.669 3.8325 0 655

19 699.6321 16.0314 3 672

20 736.3808 58.0319 12 707

21 740.1764 .4519 0 711

22 762.3821 15.6953 3 732

23 771.226 29.8181 6 741

24 813.9703 7.114 1 782

25 815.6082 .5984 0 784

26 834.4834 .002 0 802

27 894.274 5.5106 1 859

28 905.4617 2.9428 0 870

29 949.9695 13.9642 3 913

30 956.124 .3943 0 919

31 961.4425 .357 0 924

32 972.7133 131.9082 28 935

33 993.5199 .6646 0 955

34 1008.324 4.359 0 969

35 1049.167 18.5502 4 1008

36 1055.96 2.365 0 1015

37 1078.755 3.9875 0 1037

38 1106.306 1.3361 0 1063

39 1145.614 27.835 6 1101

40 1151.674 33.4329 7 1107

41 1192.35 3.136 0 1146

42 1194.133 4.8935 1 1147

43 1219.756 7.4739 1 1172

44 1300.376 82.236 17 1250

45 1331.588 14.9604 3 1280

46 1376.48 .3416 0 1323

47 1407.686 88.0114 19 1353

48 1445.589 6.0888 1 1389

49 1462.716 58.5946 12 1406

50 1495.266 .914 0 1437

51 1518.068 38.8336 8 1459

52 1562.377 219.1271 47 1501

53 1598.471 215.265 46 1536

54 1622.523 10.3597 2 1559

55 1657.516 78.1357 16 1593

56 1696.212 15.1963 3 1630

57 1852.624 462.7693 100 1780

58 3178.004 9.9324 2 3055

59 3186.401 14.1931 3 3063

60 3202.412 36.9511 7 3078

61 3209.512 20.5981 4 3085

62 3213.451 .3282 0 3089

63 3214.88 9.3193 2 3090

64 3228.261 10.2151 2 3103

65 3237.121 2.4044 0 3111

66 3276.363 7.6804 1 3149

ar73 pyr ylide phenyl B3LYP/6-31G* .9613

Gaussian 94
